# Supplementary material
Source: Research Square preprint supplement (doi:10.21203/rs.3.rs-9092994/v1)
Supplement: Supplementary file 1 [file 45441d365302bae444618cdc.docx]

**Supplementary Information for**

**Programmable Terahertz Waveform Synthesis via Coherent Interference of Phonon Polaritons**

Jixing Gao,1,2 Jiajing Hao,1,2 Yifei Fang,1,2, * Liwei Song,1,2, * Ye Tian,1,2, * and Ruxin Li,1,2,3

*1State Key Laboratory of Ultra-intense laser Science and Technology, Shanghai Institute of Optics and Fine Mechanics, Chinese Academy of Sciences, 201800 Shanghai, China*

*2Center of Materials Science and Optoelectronics Engineering, University of Chinese Academy of Sciences, 100049 Beijing, China*

3Zhangjiang Laboratory, Shanghai 201210, China

*These authors contributed equally: Jixing Gao, Jiajing Hao*

**Corresponding author:* [*yifeifang@siom.ac.cn*](mailto:yifeifang@siom.ac.cn)*;* [*slw@siom.ac.cn*](mailto:slw@siom.ac.cn)*;* [*tianye@siom.ac.cn*](mailto:tianye@siom.ac.cn)

**Contents:**

**Supplementary Note 1: Transverse optical oscillator parameters**

**Supplementary Note 2: Unnormalized intensity of [2 1] and [2 -1] of ΓA direction**

**Supplementary Note 3: Time-resolved FWM with THz polarization along the ΓM direction**

**Supplementary Note 4: Dispersion branches with phase-matching condition**

**Supplementary Note 5: Beat-note model from third-order nonlinear polarization**

**Supplementary Note 6: Double-THz control of the FWM beat-note waveform**

**Supplementary Note 1: Transverse optical oscillator parameters**

The TO phonon mode frequency , oscillator strength and damping parameter used in FDTD simulation and phase matching calculations are shown in Table S1.

**Table S1** The transverse optical oscillator parameters of crystalline quartz related to the phonon dispersion curves along the directions of ΓA and ΓM.

| ΓA | | | |
| --- | --- | --- | --- |
| Oscillator j |  |  |  |
| 1 | 1220 | 0.011 | 183.0 |
| 2 | 1080 | 0.67 | 7.452 |
| 3 | 778 | 0.11 | 4.78 |
| 4 | 529 | 0.006 | 21.16 |
| 5 | 509 | 0.05 | 7.126 |
| 6 | 495 | 0.66 | 4.455 |
| 7 | 364 | 0.68 | 5.096 |
|  | | | |
| ΓM | | | |
| Oscillator j |  |  |  |
| 1 | 1227 | 0.009 | 134.97 |
| 2 | 1163 | 0.01 | 6.978 |
| 3 | 1078 | 0.57 | 7.6112 |
| 4 | 775 | 0.25 | 7.173 |
| 5 | 485 | 1.04 | 4.05 |
| 6 | 394 | 0.33 | 2.758 |
|  | | | |

**Supplementary Note 2: Unnormalized intensity of [2 1] and [2 -1] of ΓA direction**


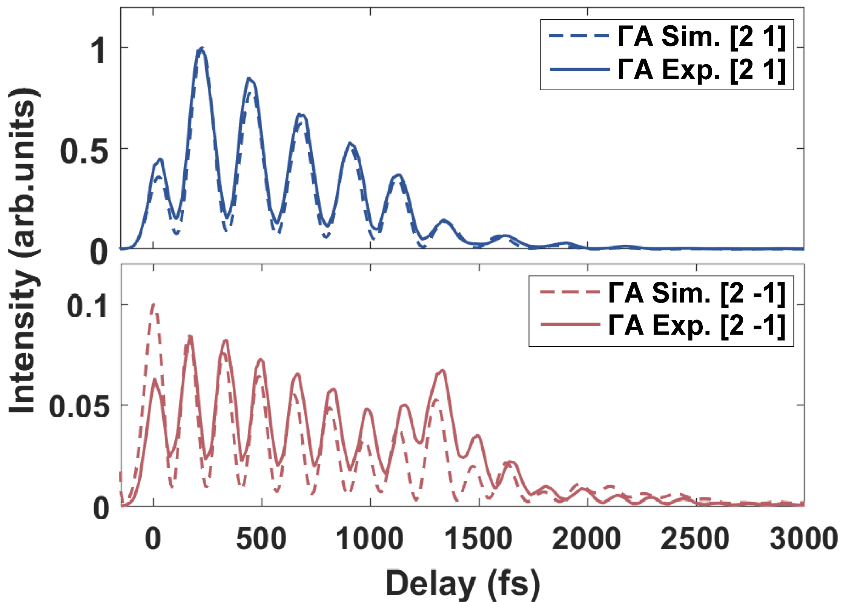


**Fig. S1** Time-resolved FWM signals with delay time as a function of pump-probe, with pump polarization along the ΓA direction. FWM signal intensity normalized with respect to [2 1].

**Supplementary Note 3: Time-resolved FWM with THz polarization along the ΓM direction**

**
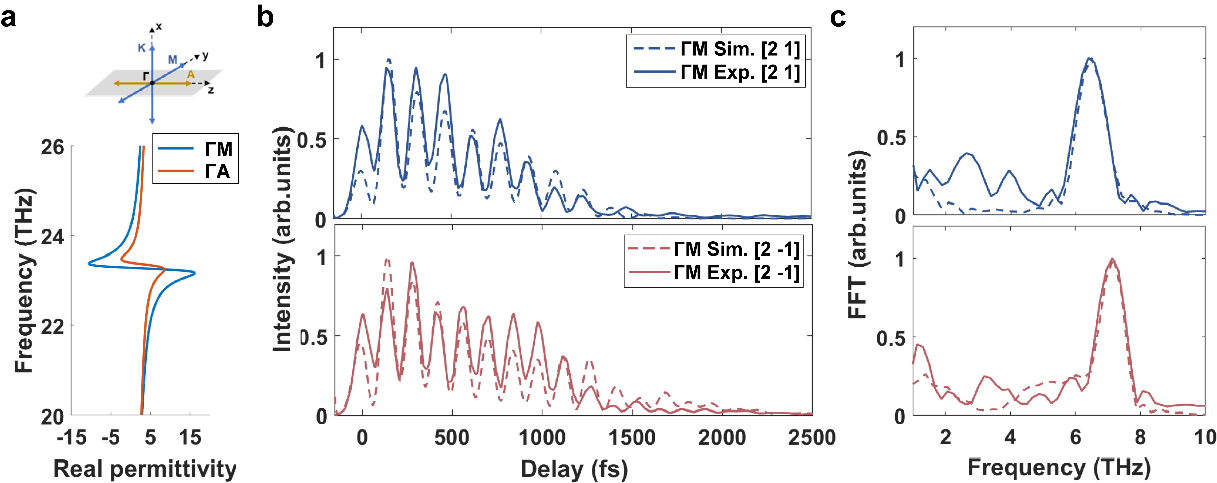
**

**Fig. S2 Polarization-resolved manipulation of the beat frequency in PhPs.** (a) Dielectric response function under THz pumping along different crystal axes. (b) Time-resolved FWM signals as a function of pump-probe, with pump polarization along the ΓM direction. (c) Fourier transform of the FWM time-delay trace shown in (b).

**Supplementary Note 4: Dispersion branches with phase-matching condition**


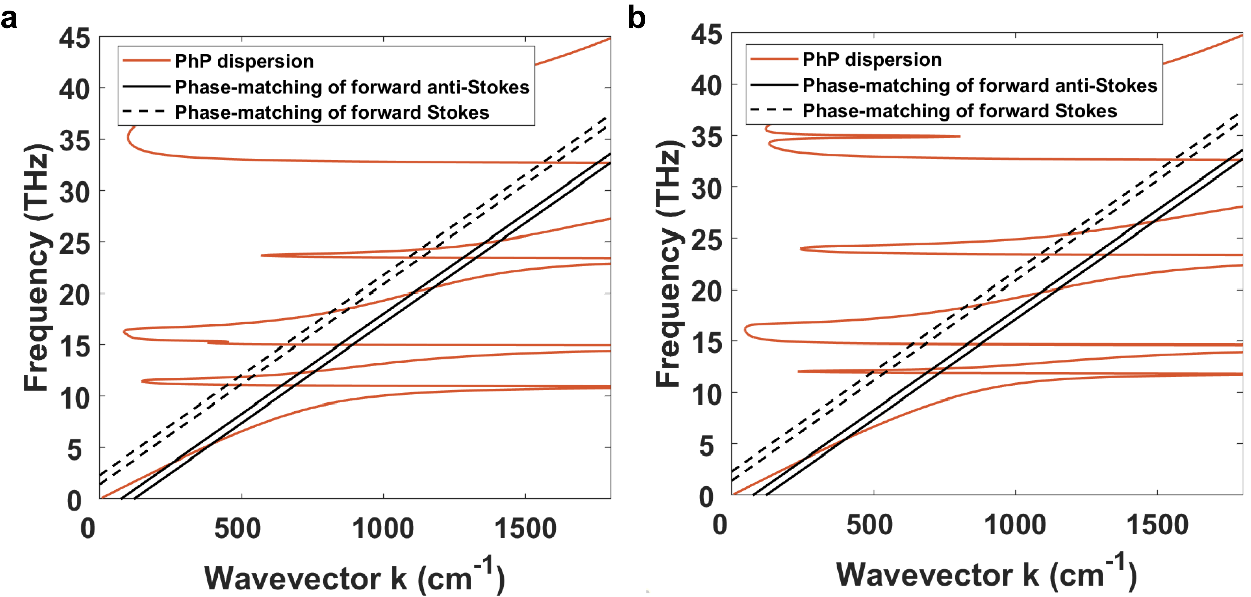


**Fig. S3** The PHP dispersion curve and FWM phase matching, with THz polarization along the (a) ΓA and (b) ΓM direction. The black dash and solid lines indicate momentum-energy matching boundaries under forward Stokes and anti-Stokes processes with the wavelength of 1.45 μm to 1.9 μm. Black dashed and solid lines indicate the momentum-energy matching boundaries for forward Stokes and anti-Stokes processes in the wavelength range of 1.45–1.9 μm

**Supplementary Note 5: Beat-note model from third-order nonlinear polarization**

We consider a four-wave mixing (FWM) process in which two probe photons mix with a THz-driven phonon–polariton (PhPs) component at frequency , generating a sideband photon at , with for the higher FWM photon and for the lower FWM photon. We write the real physical fields using complex spectral amplitudes:

A pump–probe delay between the THz-driven PhPs and the probe enters as a phase factor on the PhPs spectral component . Under the undepleted probe approximation, the third-order polarization driving the FWM process at is

where the function is defined as follows

So that the emitted FWM field at is obtained by integrating the source polarization along a crystal of thickness , yielding

The phase-matching acceptance factor is defined as follows

where the phase mismatch is

Equations (S3)–(S7) describe the most general case in which the two probe photons can originate from arbitrary spectral components and within the probe spectrum. The energy-conservation delta function constrains the participating frequency triplets, while the phase-matching acceptance factor strongly weights contributions near . For the intuitive discussion in the main text, we adopt a quasi-degenerate description appropriate for a probe spectrum centered at , i.e., . With , the phase mismatch reduces to a one-parameter function of ,

Within the bandwidth of the driving THz spectrum, the weighting by can yield two dominant phase-matched PhP contributions at and . When the detected FWM signal is collected within a finite spectral window around a chosen sideband energy, these two contributions can enter the same detection channel and interfere in the delay-dependent intensity. Accordingly, at a fixed FWM process, the emitted field can be approximated by the coherent sum

To include finite coherence of each contribution, we phenomenologically write

Taking for example, the spectrally-resolved detected signal is proportional to the intensity at the selected FWM sideband,

where and . Therefore, the delay-dependent modulation is governed by the beat frequency . Define the slowly varying baseline as:

Then Eq. (S11) can be written as

with modulation depth

If (or within a limited -window), this reduces to the constant form

**Supplementary Note 6: Double-THz control of the FWM beat-note waveform**

In Supplementary Note 5, the delay-dependent FWM signal was described by the interference of two phase-matched PhP contributions at and , leading to a beat-note modulation at . Here we extend that framework to the double-THz-pulse excitation scheme used for active waveform control, and quantify the phase/amplitude resolution expected for an experimental implementation.

Starting from Eq. (S5), the emitted FWM field is determined by the spectral PhP field . Under double-THz excitation, we write

where and are narrowband spectra peaked at the two phase-matched PhP frequencies and , respectively. In the narrowband limit, the CEP is approximated as a frequency-independent phase factor, whereas any fixed phase lag associated with PhP excitation, propagation, and nonlinear conversion is absorbed into constant phases introduced below.

Substituting Eq. (S16) into Eq. (S5), and retaining only the two dominant phase-matched contributions selected by the detection window, the emitted FWM field reduces to the same two-mode form as Eq. (S10), but now with the amplitudes and phases controlled by the two THz pulses:

here and are complex pathway coefficients (consistent with the appearance of in Supplementary Note 5 and below); their magnitudes are determined by the excitation efficiencies of the two phase-matched channels and are therefore controlled by the field strengths of THzA and THzB, respectively. The and represent all fixed phase contributions. The sign follows the convention in Supplementary Note 5.

Using Eq. (S17), the detected FWM intensity becomes

where . Equation (S18) is the double-THz extension of Eq. (S11): the beat frequency remains fixed by the two phase-matched PhP frequencies, whereas the phase and modulation depth become externally tunable. Accordingly, the slowly varying baseline , the modulation depth , and the approximately constant form of for are still given by Eqs. (S12)–(S15). The only difference is that and are now externally controlled by the two THz pulses. In particular, Eq. (S15) shows that the modulation depth is maximized when and are comparable. In our simulation where is fixed and only is scanned, one has

where the constant term has been absorbed into . Thus, varying shifts the phase of the beat-note waveform without changing . By contrast, at fixed CEPs, changing the field strength of THzB modifies , and therefore changes through Eq. (S15), while also leaving the beat frequency essentially unchanged. This identifies the CEP as a phase knob and the THz field strength as an amplitude knob.

To quantify the phase resolution, we start from Eq. (S13). After normalization by the slowly varying baseline , one obtains

within a fitting window where varies slowly, we approximate as constant. The phase sensitivity is then

as the root-mean-square (RMS) noise of the normalized trace is , standard error propagation gives the single-point phase uncertainty

at the quadrature point, where ,

Therefore, the signal resolution is limited by two factors: phase-setting resolution and the phase-readout uncertainty. The former is determined by the step resolution of delay stage. If the CEP of THzA is tuned by shifting the temporal position of the narrowband THzA waveform by , then , where is the carrier frequency of THzA. If the delay is implemented with a retroreflecting translation stage of step size , then . The latter corresponds to the laser energy stability limit. From Eq. (S20),

so that the optimal single-point uncertainty in is of order . Accordingly, the minimum resolvable change in the THzB field is determined by the corresponding change it produces in . The experimentally resolvable phase step must therefore exceed both the phase-setting resolution and the phase-readout uncertainty

For a representative experimental implementation, taking gives a carrier period . If the CEP of THzA is tuned by the delay stage with minimum step size , the corresponding delay increment is, which gives . The corresponding equivalent timing step of the output beat-note waveform is

For 4.3, 6.0, and 7.1 THz, this gives

respectively.

In this analysis, we utilize the experimentally measured results of the laser system's RMS energy stability obtained within a 1-hour measurement window. Taking and , Eq. (S23) gives , which corresponds to

for 4.3, 6.0, and 7.1 THz, respectively. The experimentally achievable phase (timing) resolution is determined by the larger of the phase-setting granularity and the readout-limited uncertainty:

Finally, it should be further clarified that, based on the above analysis, the double-pulse scheme holds the potential to achieve sub-femtosecond (<1 fs) time-resolved control: for example, when the laser energy stability is optimized to and a piezoelectric stage with a step size of 20 nm is used, these correspond to minimum time resolutions of 0.76 fs (for laser stability) and 0.62 fs (for the delay stage), respectively. This distinction provides a physically transparent framework for evaluating and optimizing programmable double-THz control of the PhP-mediated FWM beat-note waveform.
